# Supplementary material for: Cadherins regulate nuclear topography and function of developing ocular motor circuitry
Source: eLife. 2020 Oct 1;9:e56725. doi: 10.7554/eLife.56725 (PMC7599068; doi:10.7554/eLife.56725)
Supplement: Figure 1—figure supplement 3—source data 1. [file elife-56725-fig1-figsupp3-data1.xlsx]

## Sheet: Figure 1 - S3Q
	ventral nIII															dorsolateral nIII															dorsomedial nIII															nIV
dapB	46.1723	63.5083	61.4243	48.9303	25.5643	7.03917	49.3152	67.6652	69.9632	8.51567	-60.9912	-67.5322	-64.3347	-60.4467	-77.4757	-41.1382	64.0073	61.8073	48.4283	39.7433	51.4382	73.0267	112.372	108.294	193.891	-122.884	-67.1487	-83.4477	-84.0207	-88.7027	13.8383	6.01133	-363.674	48.4283	49.3343	62.8257	14.1192	85.8097	109.798	118.069	-80.2432	-76.3607	-90.9307	-110.767	-115.986	108.296	164.658	161.567	147.762
cdh2	4115.26	5744.67	5982.11	6817.5	7585.41	4970.48	5307.84	5741.58	6328.34	6081.45	4505.85	4550.33	5491.18	5516.28	5977.49	6433.76	7340.66	5800.16	7493.65	6717.94	4970.48	5307.84	5741.58	6328.34	6081.45	6216.43	7602.51	2894.22	6730.25	6673.07	3684.98	5800.16	7493.65	9468.4	11136.2	4194.02	4866.42	6200.03	3697.44	3901.36	6441.48	6683	6345.64	8724.25	9160.89	2322.37	6304.12	7830.64	8822.67
cdh4	195.718	2652.01	1016.52	3364.91	4375.17	648.236	1327.66	1440.03	2041.15	2264.97	13.9214	1477.03	2131.64	2252.24	3137.65	1691.31	-601.368	1971.53	1406.7	2522.57	868.745	2028.92	-59.9672	1529.62	2999.06	45.9269	1544.45	2182.16	2092.64	1822.69	3131.27	1971.53	1406.7	482.889	-1101.07	1450.88	1471.49	830.887	1102.25	895.743	271.876	873.851	962.755	304.045	1379.45	3230.68	1916.16	1415.26	1225.48
cdh7a	1458.17	1703.8	2237.95	2232.28	2467.74	1165.11	985.126	1003.84	982.548	1090.57	1016.95	1428.66	1537.8	2035.24	3036.77	2450.07	2104.6	2187.6	2179.25	2129.52	1375.3	1360.56	3117.36	3054.22	2458.13	1951.76	2672.78	3278.42	2968.24	2349.57	1810.39	2691.01	4746.19	2179.25	2283.35	1429.62	2044.28	3101.55	2411.88	2076.78	1224.94	2998.72	2046.15	2260.64	2631.36	3837.24	2634.09	2323.39	3097.11
cdh8	4490.87	6042.66	4911.05	4972.12	1808.64	6666.96	7682.66	6245.66	3126.34	1564.29	6064.77	8146.63	7587.01	5041.85	4947.63	1310.16	1804.28	1709.81	2213.38	2114.43	2246.5	2215.91	2737.7	3280.71	2259.5	2729.37	3221.92	4794.18	6247.31	8308.38	2306.97	1081.97	1109.06	2213.38	4324.76	2804.79	1171.22	681.788	712.502	2298.87	3579.08	4059.08	5296.11	5483.96	8218.31	4690.41	3136.75	2895.62	3040.53
cdh10a	504.308	962.107	1011.99	1021.73	842.654	1229.44	1293.57	811.117	864.429	859.48	1197.93	1667.8	1768.52	1842.58	1039.01	4576.29	2775.78	2737.98	2706.66	2021.24	889.429	2609.79	3520.87	1463.69	1193.01	1704.57	1954.26	1424.68	1196.04	1237.11	801.306	280.162	1262.33	2706.66	811.588	840.465	868.917	704.769	1463.69	1714.24	4836.32	1628.09	1178.38	835.41	1216.21	3038.34	2185.3	1499.57	831.569
cdh11	1030.31	1592.55	2205.65	2819.64	2499.76	2101.83	2261.63	2821.27	2226.71	2402.03	1498.34	2098.33	1978.15	1579.26	1735.45	1829.58	2540.27	1986.33	1202.95	1342.03	2886.64	3032.35	2534.52	2110.21	2753.89	2577.12	1826.55	2432.81	1675.69	998.495	2885.3	2094.97	1019.31	1202.95	2284.44	995.46	1772.61	1860.16	1314.42	1016.82	2833.54	2429.47	2491.47	1606.61	2056.03	4176.3	3358.96	4039.04	3878.43
cdh13	956.525	899.337	810.875	883.179	1297.07	367.491	484.885	608.601	638.901	917.632	-166.298	69.4762	259.971	579.495	987.773	1971	2068.37	1850.55	1749.07	1578.7	1254	2157.24	2718.08	3155.53	2117.69	421.579	716.077	1481.13	1571.08	2299.89	530.82	420.63	372.851	336.416	290.916	1030.82	920.63	872.851	1336.42	790.915	424.289	1042.22	332.975	385.581	641.103	838.613	1289.44	1474.13	765.742
[truncated: 11 more columns]
