# Supplementary material for: Cadherins regulate nuclear topography and function of developing ocular motor circuitry
Source: eLife. 2020 Oct 1;9:e56725. doi: 10.7554/eLife.56725 (PMC7599068; doi:10.7554/eLife.56725)
Supplement: Figure 1—source data 1. [file elife-56725-fig1-data1.xlsx]

## Sheet: Figure 1L
	ventral nIII															dorsolateral nIII															dorsomedial nIII															nIV
dapB	18.6095	15.4865	11.2495	6.339	0.4385	-46.7433	-27.4623	-38.4813	-56.2593	-50.3028	-61.1435	-16.603	-11.941	8.705	21.425	-35.91	-31.7325	-27.0505	-22.8775	-101.704	-85.8143	-104.303	-83.3013	-158.901	-162.67	-128.169	-66.9695	-105.068	-123.023	-2.516	-73.3165	-18.058	-12.429	-52.096	-26.4365	-292.941	-56.1758	-56.5793	-95.3058	-161.266	-344.144	-60.094	-68.8565	-217.974	-81.3	-17.6375	5.4615	16.912	21.547
cdh2	4094.75	4425.89	3559.02	4731.62	3766.7	3200.69	3952.05	4849.77	4760.37	4580.39	3921.28	5417.42	6179.58	6742.57	5835.48	5959.39	5949.73	5746.35	6624.47	5303.46	3101.68	4562.04	3588.74	6804.83	1240.4	3967.26	6150.72	5762.41	7132.01	6151.65	4374.34	5386.3	5667.68	6044.85	6177.22	3967.48	3660.96	3986.59	3990.72	4990.72	3668.54	5160.17	3824.5	4191.82	3064.63	2330.1	5773.03	5894.08	7635.2
cdh4	428.996	748.216	874.68	376.793	500.016	273.565	827.727	955.184	329.276	792.083	142.527	296.872	595.773	1394.31	354.339	1706.32	1513.95	2010.91	1647.28	1408.76	1494.14	1326.19	1062.69	1125.1	1219.53	1712.39	1529.95	918.967	956.783	1488.63	2231.93	997.102	813.421	1186.68	1255.04	1922.99	606.051	491.795	505.82	734.014	2077	1059.87	953.796	853.306	636.907	664.737	820.337	1834.91	1875.17
cdh7a	1645.48	1912.96	2125.61	1640.26	1513.96	883.111	1217.27	1464.5	1333.12	1694.44	652.077	866.435	1024.46	1350.24	1468.23	2944.03	4243.07	3847.24	2576.16	1725.53	3623.98	2667.79	3007.18	2253.62	1195.92	1877.9	2066.72	1273.17	1401.8	2900.18	2055.68	1484.4	1594.51	1386.33	817.186	3262.83	2047.67	2612.42	1813.75	1773.55	1415.28	1652.04	1396.28	1243.37	1258.46	635.261	1593.61	3261.33	2459.4
cdh8	4508.67	7802.97	8438.14	3419.43	3361.52	6032.09	7875.89	7186.55	4087.39	2764.31	7585.51	8883.85	5603.48	3135.41	1943.29	2990.68	4045.84	2516.71	2678.04	1261.35	1822.97	2695.43	3212.02	2608.68	2946.99	2106.14	3463.85	4128.67	2938.54	2411.12	1672.65	1178.79	929.875	2759	1512.54	3263.48	1500.24	2477.72	1948.71	573.127	211.484	1767.88	779.141	2272.02	3108	5974.44	2799.11	3766.15	3672.78
cdh10a	1297.2	1259.03	1512.14	17.9908	170.932	99.2827	283.154	206.4	329.589	366.407	677.205	669.825	601.259	109.951	132.901	2793.85	2321.25	2211.67	1725.5	-52.3987	1384.85	1619.13	1869.19	1778.28	959.421	1752.66	1704.44	1281.41	2966.34	2535.3	5535.36	1473.25	692.575	1258.98	-156.253	1235.49	1753.4	1597.49	1346.24	1232.1	3176.22	2520.86	1656.35	1284.43	1495.61	3045.6	5254.75	3041.62	4386.77
cdh11	2153.66	2461.13	2667.25	1739.02	2523.05	2619.2	3577.2	3447.04	2537.16	2357.92	2614.28	3214.72	2689.69	2385.07	2372.87	2153.66	2461.13	2667.25	1739.02	2523.05	1906.34	2008.55	1534.35	1119.87	248.855	1824.42	2042.37	2650.37	2196.79	1214.89	1410.3	2452.5	2504.11	2411.73	2752.51	3193.45	1957.24	1718.56	1852.81	2237.38	2599.89	1381.54	2039.66	2432.33	2023.87	1931.48	2070.91	2158.5	2600.16
cdh13	119.907	44.064	26.529	183.022	31.51	-123.815	54.779	55.013	81.57	61.212	-249.518	-309.62	-315.224	-280.604	-252.237	1024.32	1251.16	445.008	1219.22	477.011	195.238	641.774	832.37	991.579	570.184	234.275	80.1105	484.768	293.286	473.442	-106.754	-28.151	-0.655	33.939	39.852	182.336	47.335	35.973	70.72	-11.559	-473.01	-316.904	-294.76	-431.89	-366.143	1478.33	1822.14	1451.86	451.596
[truncated: 11 more columns]
