# Supplementary material for: Cadherins regulate nuclear topography and function of developing ocular motor circuitry
Source: eLife. 2020 Oct 1;9:e56725. doi: 10.7554/eLife.56725 (PMC7599068; doi:10.7554/eLife.56725)
Supplement: Figure 2—source data 1. [file elife-56725-fig2-data1.xlsx]

## Sheet: Figure 3F
WT	cdh2ΔEC
6144.6	13646.8
10234.7	8915.72
11305.4	9375.47
7345.65	16816.8
4072.22	10482.4
4972.97	13319.1

## Sheet: Figure 3G
WT	cdh2ΔEC
0.00127261	0.00097615
0.000989888	0.000902856
0.000818374	0.000968647
0.00111194	0.000582733
0.00160234	0.000646657
0.00131925	0.000685432
