# Supplementary material for: Cadherins regulate nuclear topography and function of developing ocular motor circuitry
Source: eLife. 2020 Oct 1;9:e56725. doi: 10.7554/eLife.56725 (PMC7599068; doi:10.7554/eLife.56725)
Supplement: Figure 3—source data 1. [file elife-56725-fig3-data1.xlsx]

## Sheet: Figure 3G
WT	cdh2ΔEC
536.824	116.8
484.087	383.533
615.366	273.409
560.521	146.7
460.307	197.281
168.38	268.886
249.406	201.287
	97.628
	130.151
	292.363
	395.893
	128.557
	271.426
	324.592

## Sheet: Figure 3M
	WT	cdh2ΔEC
nIV (SO) cells	222	271
ipsi GFP- cells	279	400
ipsi GFP+ cells	148	278
contra GFP+ SR cells	95	7

## Sheet: Figure 3N
WT	cdh2ΔEC
24.36	0
0	2.17
64.71	0
0	0
13.33	0
0	2.94
8.33	0
6.25	0
7.69	0
0	3.57
37.5	6.25
23.68	4.41
23.53	0
17.78	0
	0
	0

## Sheet: Figure 3O
WT	cdh2ΔEC
25.64	42.86
0	32.61
11.76	25.93
20	33.33
36.67	21.43
28.57	35.29
27.78	56.52
12.5	32.08
33.33	55
38.46	60.71
47.83	37.5
31.25	33.82
18.42	43.42
20.59	43.24
46.67	61.54
	27.27

## Sheet: Figure 3P
WT	cdh2ΔEC
48.7179	57.1429
100	65.2174
17.6471	74.0741
80	66.6667
50	78.5714
71.4286	61.7647
63.8889	43.4783
81.25	67.9245
45.098	45
53.8462	35.7143
52.1739	56.25
31.25	61.7647
57.8947	56.5789
55.8824	56.7568
35.5556	38.4615

## Sheet: Figure 3Q
WT	cdh2ΔEC
60	25.5319
20.4082	24.5902
66.6667	28
23.5294	38.2353
45.1613	12.5
80.6452	34.6154
62.963	26.9841
21.0526	15.873
86.3636	18.3673
9.67742	17.6471
14.2857	30.4348
33.3333	27.6596
21.5385	82.6087
3.7037	77.7778
8	63.6364
50	50
8.43373	26.2136
27.6596	37.2881
31.8182	10.3448
	12
