# Supplementary material for: Cadherins regulate nuclear topography and function of developing ocular motor circuitry
Source: eLife. 2020 Oct 1;9:e56725. doi: 10.7554/eLife.56725 (PMC7599068; doi:10.7554/eLife.56725)
Supplement: Figure 4—source data 1. [file elife-56725-fig4-data1.xlsx]

## Sheet: Figure 4C
WT	cdh2ΔEC
58.365	48.567
41.477	45.796
35.342	51.831
41.335	52.527
41.2765	41.772
47.3015	51.756
53.558	53.344
44.4115	83.4465
53.629	57.14
43.3185	62.664
41.931	60.9225
50.174	55.5295
46.486	56.123
46.412	56.7215
