# Supplementary material for: Cadherins regulate nuclear topography and function of developing ocular motor circuitry
Source: eLife. 2020 Oct 1;9:e56725. doi: 10.7554/eLife.56725 (PMC7599068; doi:10.7554/eLife.56725)
Supplement: Figure 6—figure supplement 1—source data 1. [file elife-56725-fig6-figsupp1-data1.xlsx]

## Sheet: Figure 6 - S1I
	WT							cdh2ΔEC
SR	296.71	299.519	306.838	204.435	422.911	327.609		339.033	332.263	251.61	214.04	258.101	477.714	356.217
MR	307.274	355.872	442.285	264.19	489.777	352.598	462.203	390.167	356.389	193.016	403.609	461.686	352.77	243.3
IR	393.097	348.807	431.011	477.541	460.308	523.028		456.172	214.902	330.539	516.489	500.807	537.859	404.988
IO	594.04	482.067	573.532	467.201	603.346	491.673	481.85	592.661	580.942	485.684	643.926	479.265	467.546	429.287
SO	506.838	601.876	448.938	412.266	713.124	623.913	551.159	444.106	341.636	564.99	623.913	340.707	750.52

## Sheet: Figure 6 - S1J
	WT							cdh2ΔEC
SR	0.28	0.27	0.37	0.28	0.21	0.37		0.47	0.39	0.32	0.18	0.16	0.12	0.27
MR	0.35	0.44	0.31	0.43	0.28	0.22	0.16	0.46	0.23	0.39	0.3	0.42	0.34	0.3
IR	0.31	0.12	0.12	0.23	0.19	0.25		0.23	0.19	0.45	0.12	0.17	0.23	0.38
IO	0.43	0.36	0.47	0.62	0.33	0.47	0.57	0.49	0.49	0.64	0.25	0.21	0.36	0.51
SO	0.28	0.34	0.53	0.58	0.21	0.42	0.28	0.37	0.53	0.43	0.28	0.18	0.5
