# Supplementary material for: Cadherins regulate nuclear topography and function of developing ocular motor circuitry
Source: eLife. 2020 Oct 1;9:e56725. doi: 10.7554/eLife.56725 (PMC7599068; doi:10.7554/eLife.56725)
Supplement: Figure 6—source data 1. [file elife-56725-fig6-data1.xlsx]

## Sheet: Figure 6C
	WT														cdh2ΔEC
SR	7	3	2	2	4	2	2	2	2	3	1	2	2	1	5	4	3	6	5	3	1	3	1	2	2	1	3	2	1
MR	1	1	3	1	1	1	3	3	1	3	1	2	1	1	2	3	2	1	2	1	2	2	1	3	1	2	1	2	3
IR	1	1	1	1	2	1	1	1	2	1	1	1	2	1	2	1	2	1	2	1	2	2	1	1	3	2	2	2	1
IO	4	4	4	3	8	5	1	4	4	2	1	1	2	1	4	2	6	5	4	7	2	1	1	2	5	2	3	3	2
SO	2	2	1	1	1	1	1	1	1	1	1	1	1	1	1	2	1	1	2	1	1	3	1	1	1	1	2	1	1
