# Supplementary material for: Cadherins regulate nuclear topography and function of developing ocular motor circuitry
Source: eLife. 2020 Oct 1;9:e56725. doi: 10.7554/eLife.56725 (PMC7599068; doi:10.7554/eLife.56725)
Supplement: Figure 7—source data 1. [file elife-56725-fig7-data1.xlsx]

## Sheet: Figure 7C
Strong Eye			Weak Eye
WT	cdh2ΔEC		WT	cdh2ΔEC
0.565556	0.613354		0.501177	0.563052
0.265287	0.507755		0.635407	0.709613
0.646309	0.172803		0.646049	0.146687
0.275895	0.42891		0.513155	0.367451
0.533476	0.450642		0.566456	0.409662
0.530322	0.241859		0.63896	0.25633
0.585165	0.464722		0.766288	0.431264
0.526261	0.39993		0.673715	0.212775
0.353148	0.577811		0.458959	0.512495
0.652356	0.429265		0.609514	0.429265
0.187262	0.272817		0.419572	0.25578
0.497693	0.104912		0.605474	0.185678
0.200153	0.159058		0.43323	0.149329
0.457722	0.205388		0.467151	0.20543
0.404687	0.12819		0.450297	0.135316
0.410526	0.0760499		0.384632	0.125892
0.453684	0.470515		0.566621	0.486306
0.508506			0.435762
0.427489			0.430568
0.382325			0.478972

## Sheet: Figure 7D
Strong Eye			Weak Eye
WT	cdh2ΔEC		WT	cdh2ΔEC
0.48992	0.639302		0.415261	0.530421
0.574988	0.658495		0.265287	0.548928
0.578111	0.288527		0.555639	0.157944
0.472863	0.477284		0.413743	0.366667
0.453784	0.452769		0.437937	0.41899
0.514314	0.272038		0.512806	0.314462
0.673947	0.407076		0.338238	0.385381
0.571057	0.177956		0.566238	0.447801
0.299601	0.522502		0.349925	0.628523
0.560354	0.390887		0.528891	0.334897
0.434453	0.457053		0.193665	0.263704
0.425483	0.288742		0.517204	0.0843924
0.435837	0.176918		0.202537	0.173685
0.421064	0.299769		0.330123	0.154245
0.362219	0.169639		0.368987	0.113792
0.350073	0.137666		0.277509	0.062667
0.477495	0.571504		0.309952	0.435001
0.466251			0.33179
0.415963			0.259404
0.334982			0.341393

## Sheet: Figure 7E
Strong Eye			Weak Eye
WT	cdh2ΔEC		WT	cdh2ΔEC
45.4034	31.0814		38.7609	29.5885
38.614	39.6889		20.0154	30.6643
37.8403	10.8006		34.209	9.21004
38.1438	23.3244		28.5122	22.719
40.3109	28.6955		38.444	28.2097
40.7687	23.9081		34.8494	23.0831
49.869	26.9356		30.8741	25.1849
40.4431	29.1839		37.3143	12.7839
31.894	34.1062		28.7939	33.6359
38.6964	24.966		37.2535	20.4627
28.6958	37.6763		13.2919	32.4136
43.1007	27.6424		41.5971	13.1594
32.6787	19.5341		16.3193	18.1725
35.1812	24.3759		29.8472	16.0277
32.894	16.4058		30.6141	12.1973
29.8298	20.4135		27.8516	13.0406
39.39	31.8629		31.4293	28.6576
35.9758			34.1316
36.4539			31.4436
35.8423			30.3901
